1 **Title: Morphological Cell Profiling of SARS-CoV-2 Infection Identifies**  
2 **Drug Repurposing Candidates for COVID-19**  
3

4 **Running Title: Drug Repurposing Screening for Covid19**

5 Carmen Mirabelli<sup>1,\*</sup>, Jesse W. Wotring<sup>2,\*</sup>, Charles J. Zhang<sup>2,†</sup>, Sean M. McCarty<sup>2,†</sup>, Reid  
6 Fursmidt<sup>3,4,†</sup>, Tristan Frum<sup>5</sup>, Namrata S. Kadambi<sup>3</sup>, Anya T. Amin<sup>3</sup>, Teresa R. O'Meara<sup>1</sup>, Carla D.  
7 Pretto<sup>1</sup>, Jason R. Spence<sup>3,5</sup>, Jessie Huang<sup>6,7</sup>, Konstantinos D. Alysandratos<sup>6,7</sup>, Darrell N. Kotton<sup>6,7</sup>,  
8 Samuel K. Handelman<sup>3,4</sup>, Christiane E. Wobus<sup>1</sup>, Kevin J. Weatherwax<sup>4,8,9</sup>, George A.  
9 Mashour<sup>4,8,10</sup>, Matthew J. O'Meara<sup>11‡</sup>, Jonathan Z. Sexton<sup>2,3,4,8‡</sup>

10

11 <sup>1</sup>Department of Microbiology and Immunology, University of Michigan Medical School, Ann Arbor, MI, 48109, USA

12 <sup>2</sup>Department of Medicinal Chemistry, College of Pharmacy, University of Michigan, Ann Arbor, MI, 48109, USA

13 <sup>3</sup>Department of Internal Medicine, Gastroenterology, Michigan Medicine at the University of Michigan, Ann Arbor, MI,  
14 48109, USA

15 <sup>4</sup>U-M Center for Drug Repurposing, University of Michigan, Ann Arbor, MI, 48109, USA

16 <sup>5</sup>Department of Cell and Developmental Biology, University of Michigan, Ann Arbor, MI, 48109, USA

17 <sup>6</sup>Center for Regenerative Medicine of Boston University and Boston Medical Center, Boston, MA, 02118, USA

18 <sup>7</sup>The Pulmonary Center and Department of Medicine, Boston University School of Medicine, Boston, MA, 02118, USA

19 <sup>8</sup>Michigan Institute for Clinical and Health Research (MICHR), University of Michigan, Ann Arbor, MI, 48109, USA

20 <sup>9</sup>College of Pharmacy, University of Michigan, Ann Arbor, MI 48109, USA

21 <sup>10</sup>Department of Anesthesiology, Michigan Medicine at the University of Michigan, Ann Arbor, MI, 48109, USA

22 <sup>11</sup>Department of Computational Medicine and Bioinformatics, University of Michigan, Ann Arbor, MI, 48109, USA

23 \*These authors contributed equally to this work.

24 †These authors contributed equally to this work.

25 ‡Co-Senior Authors

26 **Abbreviations:**

27 MOI: multiplicity of infection

28 COVID-19: Coronavirus Disease-2019

29 MOA: mechanism of action

30 iAEC2: induced pluripotent stem cell (iPSC)-derived alveolar epithelial type 2 cells

31 **Conflicts of interest**

32 The authors declare no conflicts of interest.

33 Correspondence and requests for materials should be addressed to [jzsexton@umich.edu](mailto:jzsexton@umich.edu)

34

35

## 36 **ABSTRACT**

37 The global spread of the severe acute respiratory syndrome coronavirus 2 (SARS-CoV-2), and  
38 the associated disease COVID-19, requires therapeutic interventions that can be rapidly  
39 identified and translated to clinical care. Traditional drug discovery methods have a >90% failure  
40 rate and can take 10-15 years from target identification to clinical use. In contrast, drug  
41 repurposing can significantly accelerate translation. We developed a quantitative high-  
42 throughput screen to identify efficacious agents against SARS-CoV-2. From a library of 1,425  
43 FDA-approved compounds and clinical candidates, we identified 17 dose-responsive  
44 compounds with *in vitro* antiviral efficacy in human liver Huh7 cells and confirmed antiviral  
45 efficacy in human colon carcinoma Caco-2, human prostate adenocarcinoma LNCaP, and in a  
46 physiologic relevant model of alveolar epithelial type 2 cells (iAEC2s). Additionally, we found  
47 that inhibitors of the Ras/Raf/MEK/ERK signaling pathway exacerbate SARS-CoV-2 infection *in*  
48 *vitro*. Notably, we discovered that lactoferrin, a glycoprotein classically found in secretory fluids,  
49 including mammalian milk, inhibits SARS-CoV-2 infection in the nanomolar range in all cell  
50 models with multiple modes of action, including blockage of virus attachment to cellular heparan  
51 sulfate and enhancement of interferon responses. Given its safety profile, lactoferrin is a readily  
52 translatable therapeutic option for the management of COVID-19.

## 53 **IMPORTANCE**

54 Since its emergence in China in December 2019, SARS-CoV-2 has caused a global pandemic.  
55 Repurposing of FDA-approved drugs is a promising strategy for identifying rapidly deployable  
56 treatments for COVID-19. Herein, we developed a pipeline for quantitative high-throughput  
57 image-based screening of SARS-CoV-2 infection in human cells that led to the identification of  
58 several FDA-approved drugs and clinical candidates with *in vitro* antiviral activity.

## 59 INTRODUCTION

60 SARS-CoV-2 is an enveloped, positive-sense, single-stranded RNA betacoronavirus that  
61 emerged in Wuhan, China in November 2019 and rapidly developed into a global pandemic.

62 The associated disease, COVID-19, manifests with an array of symptoms, ranging from flu-like  
63 illness and gastrointestinal distress (1, 2) to acute respiratory distress syndrome, heart  
64 arrhythmias, strokes, and death (3, 4). Recently, the FDA issued emergency approval of  
65 remdesivir, a nucleoside inhibitor prodrug developed for Ebola virus treatment (5). However,  
66 there are no established prophylactic strategies or direct antiviral treatments available to limit  
67 SARS-CoV-2 infections and to prevent the associated disease COVID-19.

68 Repurposing of FDA-approved drugs is a promising strategy for identifying rapidly deployable  
69 treatments for COVID-19. Benefits of repurposing include known safety profiles, robust supply  
70 chains, and a short time-frame necessary for development (6). Additionally, approved drugs can  
71 serve as chemical probes to understand the biology of viral infection and inform on the  
72 molecular targets/pathways that influence SARS-CoV-2 infection. To date, several drug  
73 repurposing screening efforts have been reported in various cell systems including non-human  
74 primate VeroE6 (7), Huh7.5 (8) and Caco-2 cells (9) with a significant overlap in reported drugs  
75 but with wide-ranging potencies. Here, we developed a pipeline for quantitative high-throughput  
76 image-based screening of SARS-CoV-2 infection that led to the identification of several FDA-  
77 approved drugs and clinical candidates with previously unreported *in vitro* antiviral activity. We  
78 also determined that inhibitors of the Ras/Raf/MEK/ERK signaling pathway exhibited proviral  
79 activity in Huh7. Mechanism of action studies of lactoferrin, the most promising hit, identified  
80 that it inhibits viral attachment, enhances antiviral host cell responses, and potentiates the  
81 effects of remdesivir.

## 82 RESULTS

83 To determine the optimal cell line and assay timing for antiviral drug screening, we assessed  
84 SARS-CoV-2 infectivity in Vero E6 (African green monkey kidney cells), Caco-2 (human colon  
85 adenocarcinoma cells), Huh7 (human hepatocyte carcinoma cells) and LNCaP (human prostate  
86 adenocarcinoma). Viral growth kinetics at a multiplicity of infection (MOI) of 0.2 revealed that  
87 each cell line supported viral infection with peak viral titers at 48 hours post infection (hrs p.i.),  
88 except for Caco-2, which took 72 hrs (Fig. S1A). The Huh7 cell line was selected for drug  
89 screening because it produced the maximum percentage of infected cells (~20%) at 48 hrs p.i.  
90 at a MOI of 0.2, while Caco-2 and LNCaP required higher MOI to show the same infection rates  
91 (Fig. S1B). Huh7 also exhibited superior signal to background for N protein staining, and viral  
92 infection was detectable at an MOI of as low as 0.004 at 48 hrs p.i. (Fig. S1C).

### 93 **Cell morphological profiling of SARS-CoV-2 infected cells**

94 To gain insight into cellular features that are being perturbed upon infection, a cell painting style  
95 morphological profiling assay was developed in 384-well plates. A multiplexed fluorescent dye  
96 set labeling the SARS-CoV-2 nucleocapsid protein (N), nuclei (Hoechst 33342), neutral lipids  
97 (HCS LipidTox Green), and cytoplasm (HCS CellMask Orange) was used to capture a wide  
98 variety of cellular features relevant to viral infectivity, including nuclear morphology, nuclear  
99 texture, and cytoplasmic and cytoskeletal features. Cell level features of infected and uninfected  
100 cells were measured using a CellProfiler (7) image analysis pipeline. We observed several  
101 prominent features associated with SARS-CoV-2 infection, including the formation of syncytia,  
102 cytoplasmic protrusions, multiple cell shapes, and positive/negative N protein staining within the  
103 nucleus. Fig. 1A shows multiplexed images of infected and uninfected wells and resulting  
104 identification/segmentation of infected cells. To systematically explore the morphologies of  
105 infected cells, features were dimensionally reduced via the non-linear uniform manifold  
106 approximation and projection (UMAP). The analysis showed five regions of interest (ROI) (Fig.  
107 1B) with selected phenotypes. These phenotypes included rounded up cells with intense N

108 staining overlapping with the nuclei (ROI I), diffuse N staining in the cytoplasm of cells with  
109 normal shape and size (ROI II), and cells with abnormal cytoplasmic protrusions containing  
110 punctate N staining (ROI III) or diffused N staining (ROI IV). Most infected cells, however,  
111 clustered in syncytia (ROI V), suggesting that infection in Huh7 propagates primarily through  
112 cell-to-cell fusion. Fig. 1C shows split violin plots for prominent features that are perturbed in  
113 infected vs. uninfected cells. Viral staining, cytoplasmic intensity (CellMask), and nuclear  
114 texture all increase in infected cells. In addition, the neutral lipid droplet content increases and  
115 the radial distribution of the lipid droplets shifts outwards from the nucleus towards the plasma  
116 membrane. Increased lipid accumulation has been observed previously in Hepatitis C virus-  
117 infected Huh7 cells (8). The CellMask intensity is increased in infected cells due to the  
118 prevalence of syncytia where the disappearance of cell boundaries increases staining intensity  
119 at the cell edge. Collectively, our analysis identifies specific features characteristic of SARS-  
120 CoV-2 infected cells.

121

## 122 **Identification of FDA-approved drugs with antiviral activity against SARS-CoV-2**

123 To identify compounds with antiviral activity against SARS-CoV-2, we tested a library of 1,425  
124 FDA-approved compounds and rationally included clinical candidates (Supplementary File 1) in  
125 Huh7 cells in quantitative high-throughput screening (qHTS) at five concentrations (50 nM, 250  
126 nM, 500 nM, 1000 nM and 2000 nM). Compounds were assessed for their antiviral activity  
127 (shown schematically in Fig. 2A) using a CellProfiler (7) image analysis pipeline to: 1) identify  
128 infected objects in the N protein image (from a single cell to large syncytia), 2) measure their  
129 morphologic features, and then 3) tabulate how many nuclei reside within the infected objects to  
130 calculate the total percentage of infected cells per well. To increase the accuracy of identifying  
131 true actives and decrease the false negative rate of the assay, a liberal selection criteria was

132 employed to choose drugs for follow-up studies (see methods and Fig. 2A). 132 drugs were  
133 selected from qHTS screening or by known activity against SARS, MERS or SARS-CoV-2 and  
134 carried forward for triplicate dose-response confirmation. Ultimately, 17 dose-responsive  
135 compounds were confirmed with IC<sub>50</sub> values of less than 1 μM (Fig. 2B and Supplementary  
136 Table 1). These compounds include ten that are novel *in vitro* observations (domperidone,  
137 entecavir, fedratinib, ipratropium bromide, lactoferrin, lomitapide, metoclopramide, S1RA,  
138 thioguanine, and Z-FA-FMK), and seven previously reported (amiodarone, bosutinib, verapamil,  
139 gilteritinib, clofazimine (9, 10), niclosamide (11), and Remdesivir(12)). The remaining  
140 compounds either lacked efficacy, exhibited cytotoxicity (e.g. Digoxin), or were efficacious only  
141 at concentrations above 1 μM (e.g. hydroxychloroquine, chloroquine) and were thus not  
142 prioritized for follow-up. Collectively, the 17 identified hits could be stratified by compound class  
143 as ion channel modulators (amiodarone, verapamil, clofazimine, and S1RA), nucleosides/DNA  
144 binders (remdesivir, entecavir, niclosamide, and thioguanine), kinase inhibitors (bosutinib,  
145 fedratinib, and gilteritinib) and others (Table 1).

146

#### 147 **Hit validation in Caco-2, LNCaP, Vero E6 and an iPSC-derived model of alveolar epithelial** 148 **cells, the iAEC2.**

149 To evaluate the translatability of the 17 hits from Huh7 cells in other cell systems, we confirmed  
150 activity in LNCaP, Caco-2, and Vero E6 cell lines and in physiologically-relevant iPSC-derived  
151 alveolar epithelial type 2 cells (iAEC2s) (13). Antiviral activities across the cell systems are  
152 shown in Table 1. iAEC2s were used as a biomimetic model of the human bronchial epithelium  
153 that is involved in COVID-19 pathogenesis (14). iAEC2s are permissive to SARS-CoV-2  
154 infection, exhibiting 10-20% N protein-positive cells at MOI of 0.2 and 50-60% positivity at MOI  
155 of 10. Upon infection, we observed long tubular protrusions that co-stained with viral N protein

156 (Fig. 3A). Additionally, unlike the Huh7 model, the vast majority of infected iAEC2 cells were not  
157 present in viral syncytia, suggesting that cell-to-cell spread by cell fusion is limited in this model.  
158 Nine out of the 17 hits -amiodarone, lomitapide, ipratropium bromide, gilteritinib, fedratinib, and  
159 clofazimine, remdesivir, S1RA and bovine lactoferrin- showed dose-responsive antiviral activity  
160 against SARS-CoV-2 in iAECs (Table 1). Remarkably, even at a high MOI of 10, bovine  
161 lactoferrin, human lactoferrin, S1RA, and remdesivir ( $IC_{50} = 18$  nM) retained antiviral activity,  
162 reflecting the strong efficacy of these compounds in virus-saturated infection conditions (Fig.  
163 3B). Six compounds (Amiodarone, Ipratropium Bromide, Lactoferrin, Lomitapide, Remdesivir, Z-  
164 FA-FMK) maintained efficacy across all tested cell systems (Table 1), suggesting the targets are  
165 conserved across multiple cell types.

#### 166 **Characterization of antiviral hits and identification of compounds that exacerbate viral** 167 **infection.**

168 To stratify compounds, we performed a time-of-addition study with compound added either 4 hrs  
169 prior to infection (as done previously in the screen) or 1 hr p.i. (Fig. 4A). We infected Huh7 with  
170 SARS-CoV-2 at MOI of 1 and then quantified infection by detecting the positive-strand viral RNA  
171 genome by RNAscope (Fig 4B). We found that verapamil, entecavir, and niclosamide lost  
172 activity under these experimental conditions (Fig. 4C). Amiodarone, clofazimine, S1RA,  
173 lomitapide, Z-FA-FMK, the other nucleoside analogues remdesivir and thioguanine, and the  
174 kinase inhibitors bosutinib, fedratinib, and gilteritinib retained activity regardless of compound  
175 addition pre- or post-infection, suggesting that they inhibit post-binding entry events. Two  
176 compounds, ipratropium bromide and metoclopramide, lost activity when added 1 hr p.i.,  
177 suggesting a role in viral binding inhibition. Although they share the same molecular target  
178 (dopamine D2 receptor), metoclopramide and domperidone seem to exert their antiviral activity  
179 with different modes of action, either by directly inhibiting binding or indirect effects on the host.

180 Our screening also identified compounds that exacerbated infection. All Mitogen/Extracellular  
181 signal-regulated Kinase (MEK) inhibitors tested (cobimetinib, trametinib, and binimetinib)  
182 resulted in a >2-fold increase of viral infection in Huh7 (Fig. 5A, B). To confirm this finding, we  
183 performed RNAscope on virus-infected, cobimetinib-treated versus untreated cells 24 and 48  
184 hrs p.i. (Fig. 5C). The percentage of viral RNA-positive cells was increased at 48 hrs p.i., but not  
185 at 24 hrs p.i., following treatment, suggesting that these compounds could enhance virus  
186 spread. In addition, upon treatment with the three MEK inhibitors, and cobimetinib in particular,  
187 we observed an increased syncytia size (Fig 5A) and different patterns of localization of viral  
188 RNA and S protein within the infected cells (Fig 5C). These immunofluorescence staining  
189 patterns suggest a difference in viral compartmentalization and spread in MEK inhibitor-treated  
190 cells. The increased infection and the diffuse localization of viral RNA was recapitulated when  
191 treating the cells with a molecular probe, U0126 (10  $\mu$ M), that is commonly used as an inhibitor  
192 of the Ras-Raf-MEK-ERK pathway. Taken together, these data highlight the utility of screening  
193 FDA-approved compounds as a way of identifying cellular pathways involved in viral infection.

194

#### 195 **Lactoferrin blocks SARS-CoV-2 replication at different stages of the viral cycle.**

196 The most broadly efficacious hit identified was lactoferrin, a protein found in colostrum and  
197 airway epithelium (15). To confirm our previous finding of inhibition of N protein expression by  
198 lactoferrin, we infected Huh7 cells with SARS-CoV-2 (MOI of 0.2) under increasing doses of  
199 lactoferrin and measured viral RNA using RT-qPCR at 48 hrs p.i. (Fig. 6A). Lactoferrin exhibited  
200 a dose-dependent inhibition of viral replication (Fig. 6A) and retained antiviral activity through a  
201 range of MOIs (Fig. 6B). It maintained antiviral activity even when added 1 or 24 hrs after  
202 infection, suggesting multiple modes of antiviral action (Fig. 6B). Previous work on lactoferrin in  
203 the context of SARS-CoV-1 suggested that lactoferrin blocks viral entry by binding heparan



204 sulfate proteoglycans, which are viral attachment factors (16). Therefore, we performed a viral  
205 binding assay by incubating SARS-CoV-2 (MOI of 10) in the presence of lactoferrin (1250 nM  
206 and 6250 nM) for one hour on ice followed by quantification of viral RNA by RT-qPCR (Fig. 6C).  
207 Remdesivir was included as a negative control as it blocks viral infection at a post-binding step.  
208 Both concentrations of lactoferrin, but not remdesivir, blocked SARS-CoV-2 attachment to Huh7  
209 cells (Fig. 6C). As a positive control, Huh7 cells were treated with NaClO<sub>3</sub>, a protein sulfation  
210 inhibitor that depletes cells of heparan sulfate (17). SARS-CoV-2 binding to cells was reduced  
211 in NaClO<sub>3</sub>-treated cells, and additional lactoferrin treatment did not further reduce binding (Fig.  
212 6C). These data suggest that, similar to SARS-CoV-1, lactoferrin blocks viral attachment via  
213 neutralizing heparan sulfate proteoglycans. Another potential mechanism of action of lactoferrin  
214 is through enhancement of interferon responses, which can then limit viral replication within host  
215 cells (18). We therefore evaluated mRNA levels of IFN $\beta$  and the interferon-stimulated genes  
216 ISG15, MX1, Viperin and IFITM3 in lactoferrin-treated Huh7 cells (Fig. 6D). SARS-CoV-2  
217 infection did not result in a robust interferon response consistent with previous studies (19).  
218 However, we did detect an upregulation of IFN $\beta$  and ISG transcripts in virus-infected and  
219 lactoferrin-treated cells, suggesting that the post-entry antiviral activity of lactoferrin is interferon-  
220 mediated. To rule out iron chelation as a potential mode of action, iron-saturated hololactoferrin  
221 and transferrin were tested in Huh7 cells; the former retained activity and the latter was inactive  
222 (Fig. 6E). Given the pronounced single-agent efficacy of lactoferrin, we further tested whether  
223 combinations with the FDA-approved agent remdesivir could improve the overall antiviral  
224 activity. We found that lactoferrin potentiated the efficacy of remdesivir 8-fold (Fig. 6F),  
225 suggesting that lactoferrin could be beneficial in the management of COVID-19 both as a single  
226 agent or in combination.

227

## 228 **DISCUSSION**

229 In this study, we developed an experimental workflow based on high-content imaging and  
230 morphological profiling that allows for rapid screening of FDA-approved compounds, and  
231 identified 17 compounds that inhibit SARS-CoV-2 infection *in vitro*. Of these, seven were  
232 previously reported and serve as a benchmark validation of our endpoints and experimental  
233 approach, and ten were hitherto unknown. We evaluated the antiviral activity of the 17 hits  
234 identified in Huh7 in three transformed cell lines (VeroE6, Caco-2, and LNcaP) and one non-  
235 transformed cell line (iAECs) and observed six compounds (amiodarone, ipratropium bromide,  
236 lactoferrin, lomitapide, remdesivir, Z-FA-FMK) exhibiting activity across multiple cell lines.

237 Since the completion of this study (June 2020), over 30 studies reporting SARS-CoV-2 antiviral  
238 activity of FDA-approved drugs have been published. A meta-analysis of these *in vitro* screens  
239 (including this effort) show consensus around 11 compounds, with small total overlap between  
240 studies (20). This observation suggests that drug screening of FDA-approved compounds is  
241 highly dependent on the chosen cell line and infection conditions. It is expected that  
242 compounds exerting an antiviral effect through direct binding to viral proteins would be more  
243 independent of the chosen cell system rather than drugs modulating host cell factors that can  
244 vary widely. For example, we observed conservation of activity across cell systems for  
245 remdesivir, which directly inhibits the viral polymerase (21), and also for lomitapide, which is  
246 proposed to directly inhibit recombinant SARS-CoV-2 main protease (Mpro)(22).

247 As most FDA-approved drugs are optimized against human molecular targets, active  
248 compounds can lead to target identification of host factors involved in SARS-CoV-2 infection. Z-  
249 FA-FMK is an irreversible cathepsin L inhibitor that exhibits potent antiviral activity in all of the  
250 five cell systems tested herein, presumably because cathepsin L has been shown to be an entry  
251 factor of SARS-CoV-2 (23, 24). Another hit in our Huh7 screen, fedratinib, was approved by the  
252 FDA in 2019 for myeloproliferative neoplasms (25) and is an orally bioavailable semi-selective  
253 JAK1/JAK2 inhibitor. JAK inhibitors have been proposed for COVID-19 treatment to specifically

254 inhibit Th17-mediated inflammatory response (26, 27) and to block numb-associated kinase  
255 responsible for clathrin-mediated viral endocytosis (28). The JAK inhibitor baricitinib (29) in  
256 combination with remdesivir was recently granted emergency use authorization by the FDA,  
257 while jakotinib ([ChiCTR2000030170](#)), and ruxolitinib ([ChiCTR2000029580](#)) are currently being  
258 evaluated in clinical trials for COVID-19 as potential dual action therapeutics (antiviral and  
259 innate immune response).

260 In contrast to the antiviral drug hits, all FDA-approved MEK inhibitors tested exacerbated viral  
261 infection, likely by increasing cell-to-cell spread as suggested by the formation of larger syncytia  
262 and more diffuse localization of viral RNA and S protein within infected cells (Fig. 5). Intriguingly,  
263 in the context of other virus infections, including SARS-CoV-1, pharmacological inhibition of the  
264 Ras-Raf-MEK-ERK pathway results in restriction of viral infection (30). This underscores the  
265 importance of this pathway during viral infections and warrants further examination into the  
266 mechanism of action of this signaling cascade during SARS-CoV-2 infection.

267 This study has generated several clinically testable and readily translatable hypotheses. As an  
268 example, we observed potent antiviral activity of ipratropium bromide (Atrovent), a quaternary  
269 ammonium salt and muscarinic receptor antagonist that is commonly prescribed for asthma. It is  
270 administered via inhalation into the lungs with little systemic absorption. Given its potential  
271 mode of action as inhibitor of SARS-CoV-2 attachment, prophylaxis or post-exposure treatment  
272 with ipratropium bromide may curb infection of the upper respiratory tract and drastically reduce  
273 systemic viral spread and development of severe symptoms while achieving beneficial  
274 bronchodilation. Similarly, we identified metoclopramide and domperidone, both dopamine D2  
275 receptor antagonists used to treat gastrointestinal symptoms, as SARS-CoV-2 inhibitors.  
276 Gastrointestinal symptoms have been increasingly reported in more than half of the patients  
277 infected by SARS-CoV-2 (2). Hence, these compounds may ameliorate GI symptoms during

278 COVID-19 infection, and in addition the reduced viral load in the GI tract could also reduce  
279 fecal-oral transmission of SARS-CoV-2 (31).

280 Most noteworthy, our screen identified bovine lactoferrin, a safe and widely available dietary  
281 supplement, with multi-modal efficacy in multiple cell systems, including non-transformed and  
282 physiologically relevant iAEC2s. Lactoferrin gene expression was shown to be highly  
283 upregulated in response to SARS-CoV-1 infection (32) and, in addition to enhancing natural  
284 killer cell and neutrophil activity, lactoferrin blocks SARS-CoV-1 attachment through binding to  
285 heparan sulfate proteoglycans (15). Here, we showed that lactoferrin has a multi-modal  
286 mechanism of action against SARS-CoV-2 infection (Fig. 6). First, it strongly inhibits cellular  
287 binding of SARS-CoV-2 to cells via competition with heparan sulfate. Second, it retains antiviral  
288 efficacy at 24 hrs p.i. and it modulates host cell immunity through increased expression of  
289 interferon and several interferon-stimulated genes. Through heightening the innate immune  
290 response of host cells, orally administered lactoferrin could be especially effective in resolving  
291 the gastrointestinal symptoms that are present in COVID-19 patients (33) with a mechanism  
292 similar to norovirus infection (34). In addition, lactoferrin was previously shown to decrease the  
293 production of IL-6 (35), which is one of the key players of the “cytokine storm” produced by  
294 SARS-CoV-2 infection (36, 37). Lactoferrin is classified by the FDA as ‘Generally Recognised  
295 as Safe’ (GRAS) and therefore may represent a promising therapy for pre- and post-exposure  
296 prophylaxis.

297 Combination therapies are likely to be required for effectively treating SARS-CoV-2 infection,  
298 and this approach has already shown promise, i.e., combination therapy with interferon  $\beta$ -1b,  
299 lopinavir–ritonavir, and ribavirin showed efficacy against SARS-CoV-2 in a prospective, open-  
300 label, randomized, phase 2 trial (38). Here, we show that lactoferrin potentiates the antiviral  
301 activity of remdesivir and could be used in combination therapy with these drugs, which are  
302 currently being used or studied for the treatment of COVID-19. Due to its wide availability,

303 limited cost, and strong safety profile, lactoferrin could be a rapidly deployable option for both  
304 prophylaxis and the management of COVID-19. Although our findings are promising, further  
305 studies are needed to confirm the efficacy of our lead antiviral compounds in animal models  
306 and/or clinical studies.

307

## 308 **METHODS**

### 309 **Cells and virus.**

310 Vero E6, Caco-2, LNcaP and Huh7 cells were maintained at 37°C with 5% CO<sub>2</sub> in Dulbecco's  
311 Modified Eagle's Medium (DMEM; Welgene), supplemented with 10% heat-inactivated fetal  
312 bovine serum (FBS), HEPES, non-essential amino-acids, L-glutamine and 1X Antibiotic-  
313 Antimycotic solution (Gibco). iPSC (SPC2 iPSC line, clone SPC2-ST-B2, Boston University)  
314 derived alveolar epithelial type 2 cells (iAEC2s) were differentiated and maintained as  
315 alveolospheres embedded in 3D Matrigel in "CK+DCI" media, as previously described (Jacob et  
316 al. 2019). iAEC2s were passaged approximately every two weeks by dissociation into single  
317 cells via the sequential application of dispase (2 mg/ml, Thermo Fisher Scientific, 17105-04) and  
318 0.05% trypsin (Invitrogen, 25300054) and re-plated at a density of 400 cells/μl of Matrigel  
319 (Corning, 356231), as previously described (39). SARS-CoV-2 WA1 strain was obtained by BEI  
320 resources and was propagated in Vero E6 cells. Lack of genetic drift of our viral stock was  
321 confirmed by deep sequencing. Viral titers were determined by TCID<sub>50</sub> assays in Vero E6 cells  
322 (Reed and Muench method) by microscopic scoring. All experiments using SARS-CoV-2 were  
323 performed at the University of Michigan under Biosafety Level 3 (BSL3) protocols in compliance  
324 with containment procedures in laboratories approved for use by the University of Michigan  
325 Institutional Biosafety Committee (IBC) and Environment, Health and Safety (EHS).

326 **Viral titer determination.**

327 Vero E6, Caco-2, LNCaP and Huh7 cells were seeded in a 48-well plate at  $2 \times 10^4$  cells/well and  
328 incubated overnight at 37°C with 5% CO<sub>2</sub>. Cells were then infected with SARS-CoV-2 WA1 at a  
329 multiplicity of infection (MOI) of 0.2. One hour after infection, cells were harvested (day 0 of  
330 infection) or kept at 37°C for 1, 2 and 3 days p.i.. Viral titer determination was performed by  
331 TCID50 assay on Vero E6 cells of the total virus (supernatant and intracellular fraction).  
332 Alternatively, cells were harvested with Trizol and total cellular and viral RNA was extracted with  
333 the ZymoGen Direct-zol RNA extraction kit. Viral RNA was quantified by RT-qPCR using the  
334 2019-nCoV CDC qPCR Probe Assay and the probe set N1 (IDT technologies). IFN $\beta$ , viperin,  
335 MX1, ISG15, IFITM3 and the housekeeping gene GAPDH mRNA levels were quantified by  
336 qPCR with SsoAdvanced™ Universal SYBR® Green Supermix (Bio-Rad) with specific primers  
337 (IFN $\beta$ : F-TTGACATCCCTGAGGAGATTAAGC, R- TCCCACGTA CTCCA ACTTCCA; MX1: F-  
338 CCAGCTGCTGCATCCCACCC, R-AGGGGCGCACCTT CTCCTCA; ISG15: F-  
339 TGGCGGGCAACGAATT, R- GGGTGATCTGCGCCTTCA; IFITM3: F-TCCCAC  
340 GTACTCCA ACTTCCA, R-AGCACCAGAAACACGTGCACT; GAPDH: F-  
341 CTCTGCTCCTCCTGTTCGAC, R-GCGCCCCACCAAGCTCAAGA). Fold increase was  
342 calculated by using the  $\Delta\Delta C_t$  method over non-infected and untreated Huh7.

343 **Viral infectivity assay.**

344 384-well plates (Perkin Elmer, 6057300) were seeded with Huh7 cells at 3000 cells/well and  
345 allowed to adhere overnight. Compounds were then added to the cells and incubated for 4  
346 hours. The plates were then transferred to BSL3 containment and infected with SARS-CoV-2  
347 WA1 at a multiplicity of infection (MOI) of 0.2 in a 10  $\mu$ L addition with shaking to distribute virus.  
348 For the final dose-responses curves, porcine trypsin (Sigma-Aldrich, T0303) at a final  
349 concentration of 2  $\mu$ g/ml was included during infection. After one hour of absorption, the virus

350 inoculum was removed and fresh media with compound was added. Uninfected cells and  
351 vehicle-treated cells were included as positive and negative control, respectively. Two days  
352 post-infection, cells were fixed with 4% PFA for 30 minutes at room temperature, permeabilized  
353 with 0.3% Triton X-100, and blocked with antibody buffer (1.5% BSA, 1% goat serum and  
354 0.0025% Tween 20). The plates were then sealed, surface decontaminated, and transferred to  
355 BSL2 for staining with the optimized fluorescent dye-set: anti-nucleocapsid protein (anti-NP)  
356 SARS-CoV-2 antibody (Antibodies Online, Cat# ABIN6952432) overnight treatment at 4 °C  
357 followed by staining with secondary antibody Alexa-647 (goat anti-mouse, Thermo Fisher,  
358 A21235), Hoechst-33342 pentahydrate (bis-benzimide) for nuclei staining (Thermo Fisher,  
359 H1398), HCS LipidTOX™ Green Neutral Lipid Stain (Thermo Fisher, H34475), and HCS  
360 CellMask™ Orange for cell delineation (Thermo Fisher H32713). iAEC2 maintained in 3D  
361 culture were dissociated to single cells and seeded in collagen coated 384-well plates at a  
362 seeding density of 8000 cells/well in the presence of 10 µM Y-27632 for the first 72 hours after  
363 plating (APExBIO, A3008) to grow to roughly 80% confluence. Infection was performed at MOI  
364 of 10 in the presence of 2 µg/ml of trypsin porcine (Sigma-Aldrich, T0303). Staining protocol for  
365 the iAEC2s differed slightly with the addition of an anti-acetylated tubulin primary antibody (Cell  
366 Signaling, 5335), instead of HCS CellMask Orange, and the use of an additional secondary  
367 Alexa 488 antibody (donkey anti-rabbit, Jackson ImmunoResearch, 711-545-152).

### 368 **Compound library.**

369 The compound library deployed for drug screening was created using the FDA-Approved Drugs  
370 Screening Library (Item No. 23538) from Cayman Chemical Company. This library of 875  
371 compounds was supplemented with additional FDA approved drugs and selected clinical  
372 candidates from other vendors including MedChemExpress, Sigma Aldrich, and Tocris. Clinical  
373 candidates and chemical probes were included if they had any reported antiviral efficacy or had  
374 an association with SARS1, MERS or SARS-CoV-2. The library was formatted in five 384-well

375 compound plates and was dissolved in DMSO at 10 mM. Hololactoferrin (Sigma Aldrich,  
376 L4765), apolactoferrin (Jarrow Formulas, 121011), native human lactoferrin (Creative BioMart,  
377 LFT-8196H), and transferrin (Sigma Aldrich, T2036) were handled separately and added  
378 manually in cell culture media. Dilution plates were generated for qHTS at concentrations of 2  
379 mM, 1 mM, 500  $\mu$ M, 250  $\mu$ M and 50  $\mu$ M and compounds were dispensed at 1:1000 dilution.

### 380 **qHTS primary screen and dose response confirmation.**

381 For the qHTS screen, compounds were added to cells using a 50 nL pin tool array on a Caliper  
382 Life Sciences Sciclone ALH 3000 Advanced Liquid Handling system. Concentrations of 2  $\mu$ M, 1  
383  $\mu$ M, 500 nM, 250 nM and 50 nM were included for the primary screen. In all dose-response  
384 confirmation experiments, compounds were dispensed using an HP D300e Digital Compound  
385 Dispenser and normalized to a final DMSO concentration of 0.1% DMSO. Dose response  
386 confirmation was performed in triplicate and in 10-point:2-fold dilution. Z-primes for dose  
387 response plates ranged between 0.4-0.8.

### 388 **Imaging.**

389 Stained cell plates were imaged on both Yokogawa CQ1 and Thermo Fisher CX5 high content  
390 microscopes with a 20X/0.45NA LUCPlan FLN objective. Yokogawa CQ1 imaging was  
391 performed with four excitation laser lines (405nm/488nm/561nm/640nm) with spinning disc  
392 confocal and 100ms exposure times. Laser power was adjusted to yield optimal signal to noise  
393 ratio for each channel. Maximum intensity projection images were collected from 5 confocal  
394 planes with a 3-micron step size. Laser autofocus was performed and nine fields per well were  
395 imaged covering approximately 80% of the well area. The Thermofisher CX5 with LED  
396 excitation (386/23nm, 485/20nm, 560/25nm, 650/13nm) was also used and exposure times  
397 were optimized to maximize signal/background. Nine fields were collected at a single Z-plane as



398 determined by image-based autofocus on the Hoechst channel. The primary qHTS screen was  
399 performed using CX5 images and all dose-response plates were imaged using the CQ1.

#### 400 **Image segmentation and feature extraction and infection score.**

401 The open source CellProfiler software (12) was used in an Ubuntu Linux-based distributed  
402 Amazon AWS cloud implementation for segmentation, feature extraction, infection scoring and  
403 results were written to an Amazon RDS relational database using MySQL. A pipeline was  
404 developed to automatically identify infected cells in a field and to enable cell-level morphologic  
405 profiling. Infected areas were identified by Otsu thresholding and segmentation using the N-  
406 protein image, then all nuclei were identified in a similar manner in the Hoechst-33342 image,  
407 and the “relate objects” module was used to relate nuclei to an infected cell area. If a nucleus  
408 was found to reside within an infected area, then it and its corresponding cell area was labeled  
409 “infected”. The percentage of infected cells was tabulated by dividing the infected cell number  
410 by the total cell number summed across all 9 fields per well. To enable morphologic cell  
411 profiling, the following regions of interest were defined for feature extraction: nuclei, cell,  
412 cytoplasm, nucleoli, neutral lipid droplets and syncytia. Multiple intensity features and radial  
413 distributions were measured for each object in each channel and cell size and shape features  
414 were measured. Nuclei were segmented using the Hoechst-33342 image and the whole cell  
415 mask was generated by expanding the nuclear mask to the edge of the Cell Mask Orange  
416 image. Plate-based normalization was performed to account for variability in infection  
417 percentage. The assay window was normalized between the positive control wells (32  
418 uninfected wells representing 0% inhibition) and the negative control wells (32 infected  
419 wells, 0.1% DMSO vehicle treated representing 100% effect). The compound treated wells  
420 were scored with the RF model and the efficacy score was normalized to the individual  
421 plate.

422 **Data pre-processing.**

423 Cell level data were pre-processed and analyzed in the open source Knime analytics platform  
424 (39). Cell-level data was imported into Knime from MySQL, drug treatment metadata was  
425 joined, and features were centered and scaled. Features were pruned for low variance (<5%)  
426 and high correlation (>95%) and resulted in 660 features per cell.

427 **Statistical methods and hypothesis testing.**

428 Dose-response curves were fit and pairwise differences between experimental conditions  
429 were tested using Prism (Graphpad Software, San Diego, CA, USA). Other statistical tests  
430 including non-parametric Mann-Whitney were performed in the statistical programming  
431 language and environment R.

432 **UMAP embedding.**

433 The embed\_umap application of MPLearn (v0.1.0, <https://github.com/momeara/MPLearn>) was  
434 used to generate UMAP embeddings. Briefly, for a set of cells, each feature was per-plate  
435 standardized and jointly orthogonalized using sklearn.IncrementalPCA(n\_components=379,  
436 batch\_size=1000). Then, features were embedded into 2 dimensions using umap-learn  
437 (v0.4.1)(41). UMAP(n\_components=2, n\_neighbors=15, min\_dist=0, init='spectral',  
438 low\_memory=True). Embeddings were visualized using Holovies Datashader (v1.12.7) (42),  
439 using histogram equalization and the viridis color map.

440 **Data analytics.**

441 HC Stratominer (Core Life Analytics, Utrecht NL) was used as an independent method for hit-  
442 calling and performs fully automated/streamlined cell-level data pre-processing and score  
443 generation. IC Stratominer was also used to fit dose response curves for qHTS. Compound

444 registration and assay data registration were performed using the open source ACAS  
445 platform (Refactor BioSciences github <https://github.com/RefactorBio/acas>).

#### 446 **Dose-response analysis and compound selection.**

447 In qHTS screening, a compound was selected to be carried forward into dose response  
448 confirmation when meeting one of the following criteria: 1) Percent infected less than 25% for  
449 the median field in at least two concentrations, 2) a dose-response relationship was observed  
450 (by inspection) across the five concentrations tested, or 3) compounds of interest not meeting  
451 this criteria were carried forward if reported positive in the literature or were being evaluated in  
452 clinical trials for COVID-19.

#### 453 **Dose response analysis in the confirmation and combinatorial screening.**

454 Due to the spatial inhomogeneity of infected cells across a single well, approximately half of the  
455 fields were undersaturated, resulting in a reproducible distribution per-well. Total cell and  
456 infected cell counts were summed over the 9 fields and percent infected cells was averaged  
457 over triplicate wells. Cells treated with known fluorescent compounds, including Clofazimine,  
458 were confirmed to not have spectral interference. Dose response curves were fit with Graphpad  
459 Prism using a semilog 4-parameter variable slope model.

#### 460 **Viral Binding assay.**

461 Huh-7 cells were plated in 48-well plates at 100,000 cells per well and allowed to adhere  
462 overnight. The following day, compounds were added at the indicated concentration in serum-  
463 free DMEM and incubated for 1 hour at 4 °C. Following compound incubation, cells were  
464 infected with SARS-CoV-2 at an MOI of 10 for 1 hour at 4 °C to allow for viral binding. Cells were  
465 then washed 3 times with ice cold PBS to remove unbound virus and RNA was extracted by  
466 using the Direct-Zol RNA miniprep kit (Zymogen, R2052). Bound virus was then quantified by

467 RT-qPCR (see section Viral titer determination and host gene quantification) and percentages  
468 were calculated over the infected non-treated condition.

#### 469 **Multi-cycle cytopathogenic effect (CPE) reduction assay.**

470 Vero E6 were allowed to adhere overnight in 96-well cell culture plates. A 2-fold 10-point serial  
471 dilution of compounds (5000 nM-5 nM) and SARS-CoV-2 at MOI of 0.002 were added. CPE  
472 was evaluated by microscopic scoring at 5 d.p.i. The 50% inhibitory concentration (IC50) was  
473 calculated by logarithmic interpolation and is defined as the concentration at which the virus-  
474 induced CPE is reduced by 50%.

#### 475 **RNAscope of SARS-CoV-2 infected cells.**

476 PFA-fixed 96-well black plates (Corning, cat nr. 3036) were permeabilized with a step-wise  
477 EtOH treatment (25% EtOH for 3 minutes, 50% EtOH for 3 minutes and 70% EtOH  
478 overnight at 4 °C). The day after, cells were treated with washing buffer (25% formamide in  
479 1X SSC buffer) for 5 minutes and hybridized with custom-designed probes targeting  
480 positive-sense SARS-CoV-2 RNA directly conjugated with ATTO647 (Ann Arbor  
481 Bioscience) at 37 °C overnight in hybridization buffer (dextran sulfate, 25% formamide and  
482 0.1 % SDS). Cells were counterstained with Hoechst 33342 and anti-S protein antibody (Spike  
483 antibody 1A9, GeneTex, Cat Nr. GTX632604) and imaged using a Thermo Fisher CX5 high  
484 content microscope with a 10X/0.45NA LUCPlan FLN objective.

485

#### 486 **ACKNOWLEDGEMENTS**

487 Funding: University of Michigan Institute for Clinical and Health Research (MICHHR) (NCATS -  
488 UL1TR002240) and its Center for Drug Repurposing. JZS is supported by the National Institute

489 of Diabetes and Digestive and Kidney Diseases (R01DK120623). JWW is supported by the  
490 pharmacological sciences training program (PSTP) T32 training grant. CM is supported by  
491 Marie-Slodowska Curie individual fellowship (GA - 841247) and MICHR Postdoctoral  
492 Translational Scholars Program. KDA is supported by the I.M. Rosenzweig Junior Investigator  
493 Award from the Pulmonary Fibrosis Foundation. JRS is supported by the National Heart, Lung,  
494 and Blood Institute (NHLBI – R01HL119215), by the NIAID Novel Alternative Model Systems for  
495 Enteric Diseases (NAMSED) consortium (U19AI116482) and by grant number CZF2019-  
496 002440 from the Chan Zuckerberg Initiative DAF, an advised fund of Silicon Valley Community  
497 Foundation.

498 The authors would like to thank Matthew Chess for Amazon AWS support, Kevin Jan and  
499 Peyton Uhl at Yokogawa for imaging support, Nick Santoro at the University of Michigan Center  
500 for Chemical Genomics. We thank David Egan and Wienand Omta from Core Life Analytics for  
501 assisting high content data analytics as well as Philip Cheung and Brian Bolt at ReFactor  
502 Biosciences for assistance with HTS data registration. Finally, we thank Tracey Schultz and  
503 Dianne Jazdyk for project management.

504

505

506

507

508

509

510

511

512

513 **FIGURES AND LEGENDS**

514

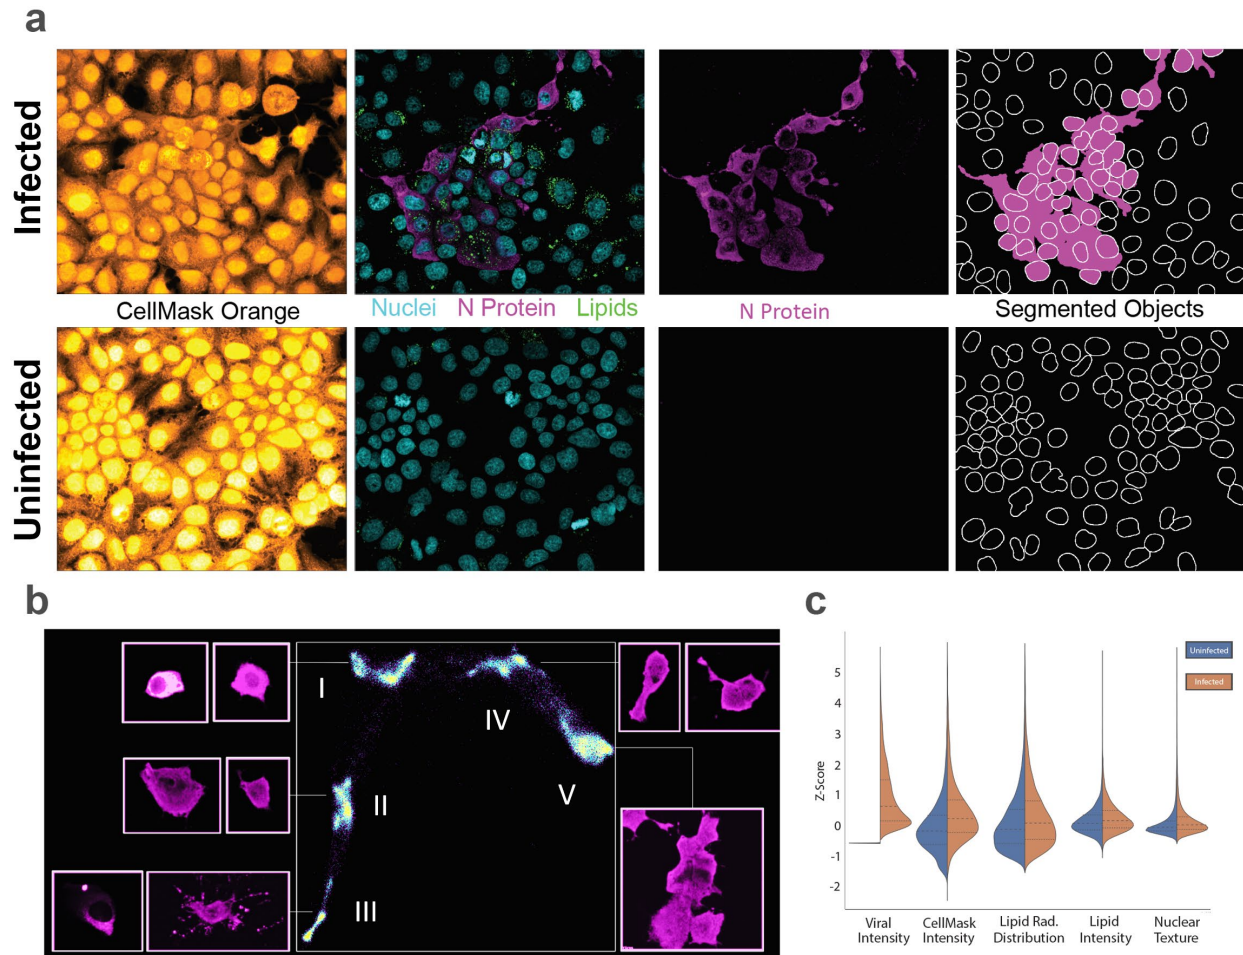

515

516

517 Figure 1. Morphological profiling of SARS-CoV-2 infected Huh7 cells (MOI of 0.2 for 48 hrs). A)

518 Clockwise: Representative field with nuclei (cyan), neutral lipids (green), and SARS-CoV-2 N

519 protein (magenta), N protein image in the same area with “fire” false color LUT showing distinct

520 morphologies of infected cells showing small/round cells with a hollow center, cells with

521 protrusions, and large syncytia, CellMask image showing cell boundaries and syncytia

522 formation. B) UMAP embedding and phenotypic clustering of 3 million cells showing distinct

523 morphologies present, including: small/bright cells (I), cells with protrusions (III), and syncytia

524 (V). C) Comparison of normalized cellular features in infected (brown) and uninfected (blue)

525 cells showing differences in cytoplasmic organization, lipid content/distribution and nuclear

526 texture. All distributions were compared with the Mann-Whitney test and are statistically

527 significant with  $P < 0.0001$ .

528

529

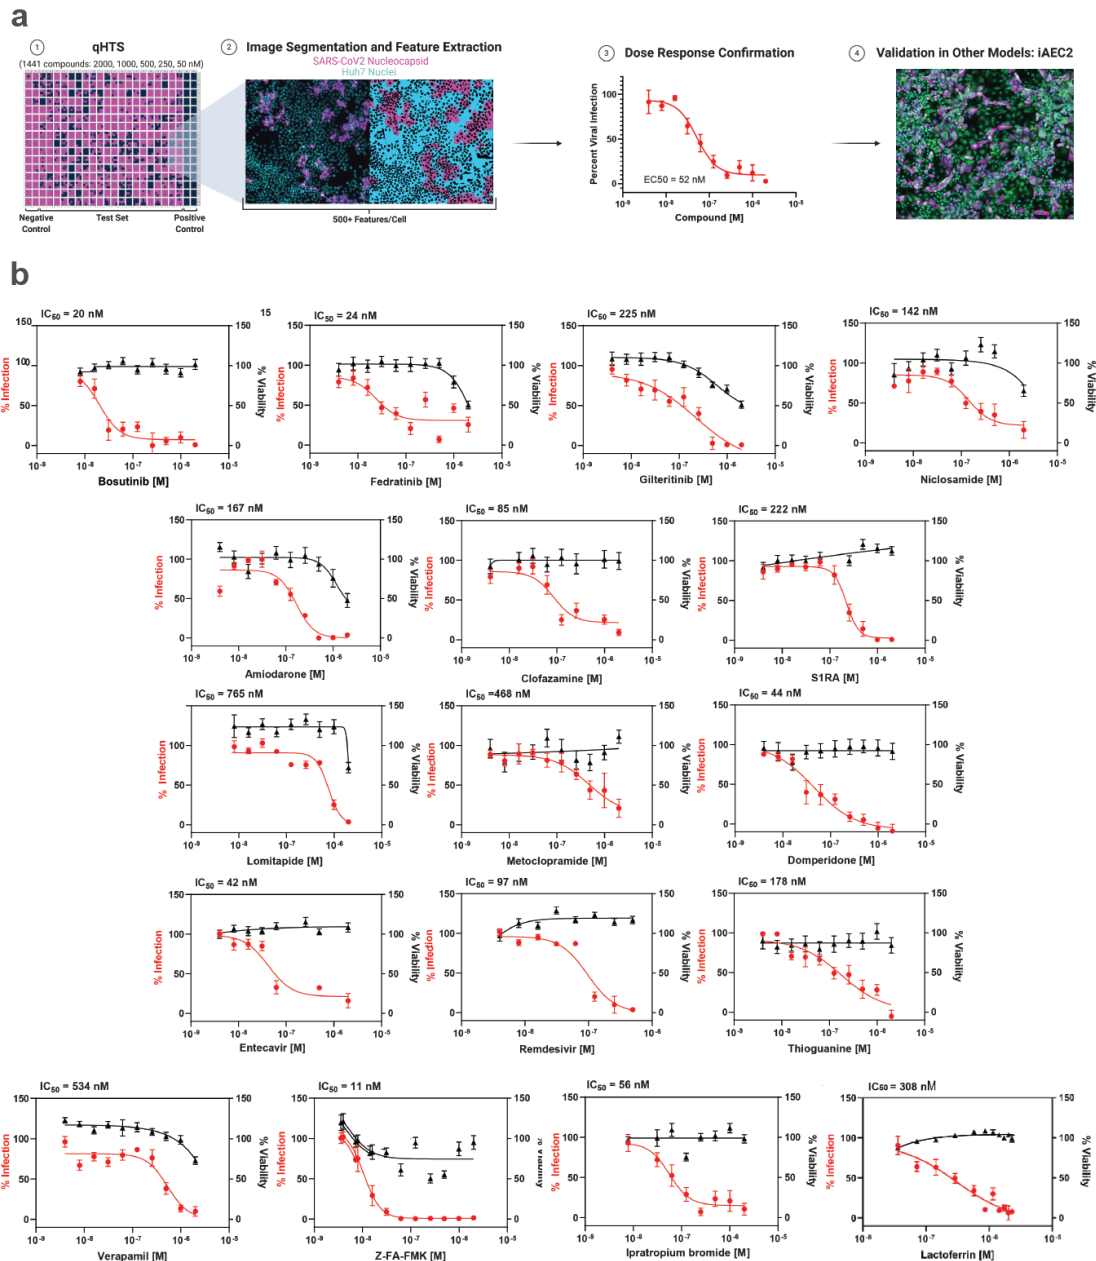

530  
531  
532  
533  
534  
535  
536  
537  
538  
539  
540  
541  
542

Figure 2. A) Schematic of the anti-SARS-CoV-2 drug repurposing screening. 1) Compounds are administered in qHTS to cells cultured on 384-well plates infected with SARS-CoV-2 and incubated for 48-hours. Each plate contains 32 negative (infected) and 32 positive (non-infected) control wells. 2) Cells are fixed, stained, and imaged. Images are analyzed using Cell Profiler to identify nuclei, cell boundaries, neutral lipid content and viral staining intensity. 3) Dose-response curves are fit to normalized percent infected cells per well. 4) Confirmation of antiviral activity in other cell lines, including a physiological relevant iPSC-derived human alveolar epithelial cell (iAECs); B) Dose-response curves of 17 compounds. Graphs represent median SEM of 10-point 1:2 dilution series of selected compounds for N=3 biological replicates. IC<sub>50</sub> values were calculated based on normalization to the control and after fitting in GraphPad Prism.

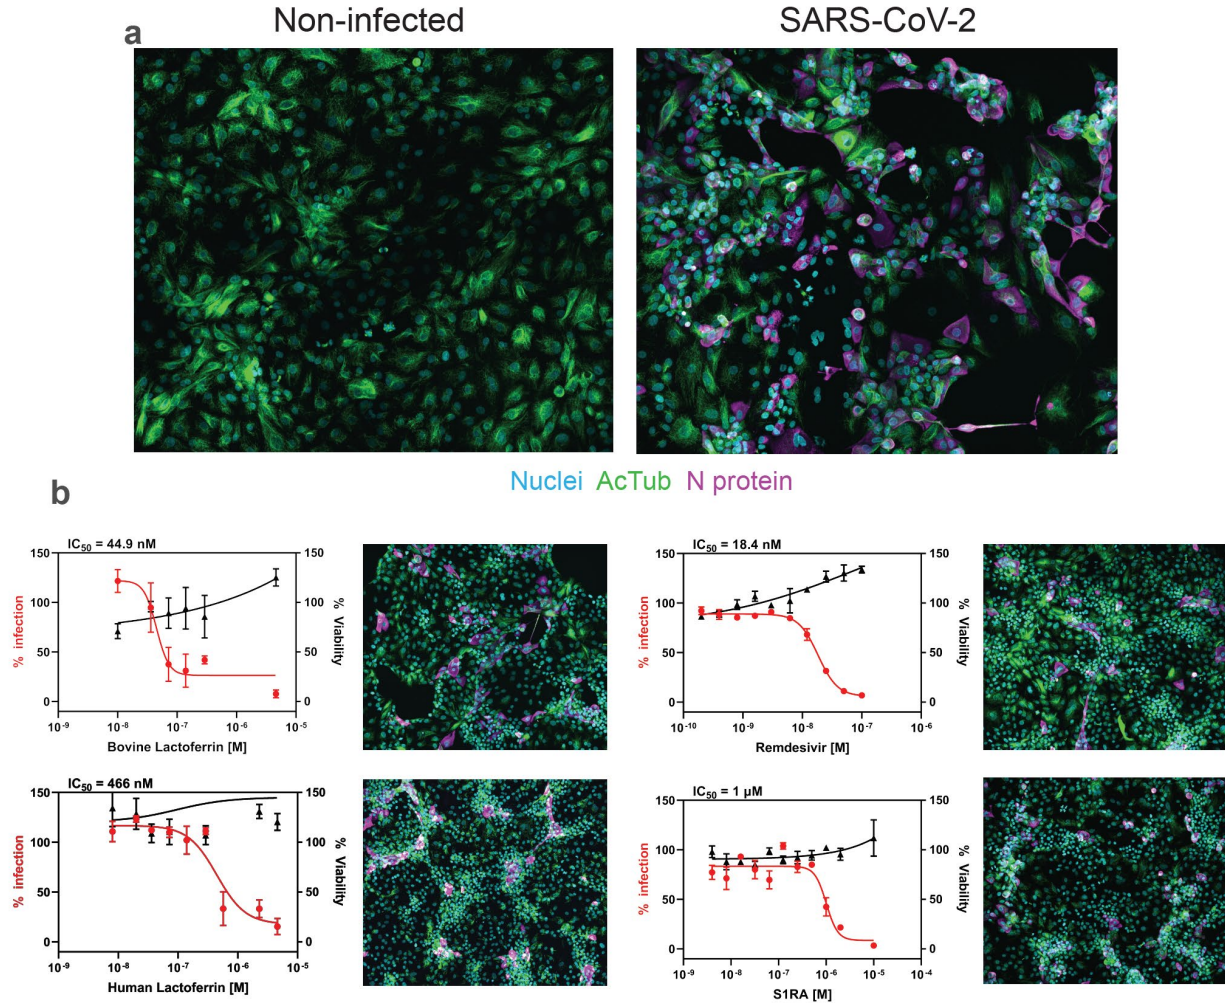

543  
544  
545  
546  
547  
548  
549  
550  
551  
552  
553  
554  
555  
556  
557  
558  
559  
560  
561  
562  
563

Figure 3. A) SARS-CoV-2 infected iAEC2 cells at MOI of 10, 48 hrs p.i. Nuclei are in cyan, N protein in magenta, and acetylated tubulin in green. Representative image was acquired on a Yokogawa CQ1 high-content imager with a 60X lens and visualized with Fiji ImageJ. B) Antiviral activity of bovine and human lactoferrin, remdesivir, and S1RA was assessed in iAEC2 cells infected with SARS-CoV-2 at MOI 10. Graphs represent median SEM of 10-point 1:2 dilution series of selected compounds for N=3 biological replicates. Representative Images of nuclei (cyan), acetylated tubulin (green), and N protein (magenta) at compound  $IC_{50}$  dose are also represented.



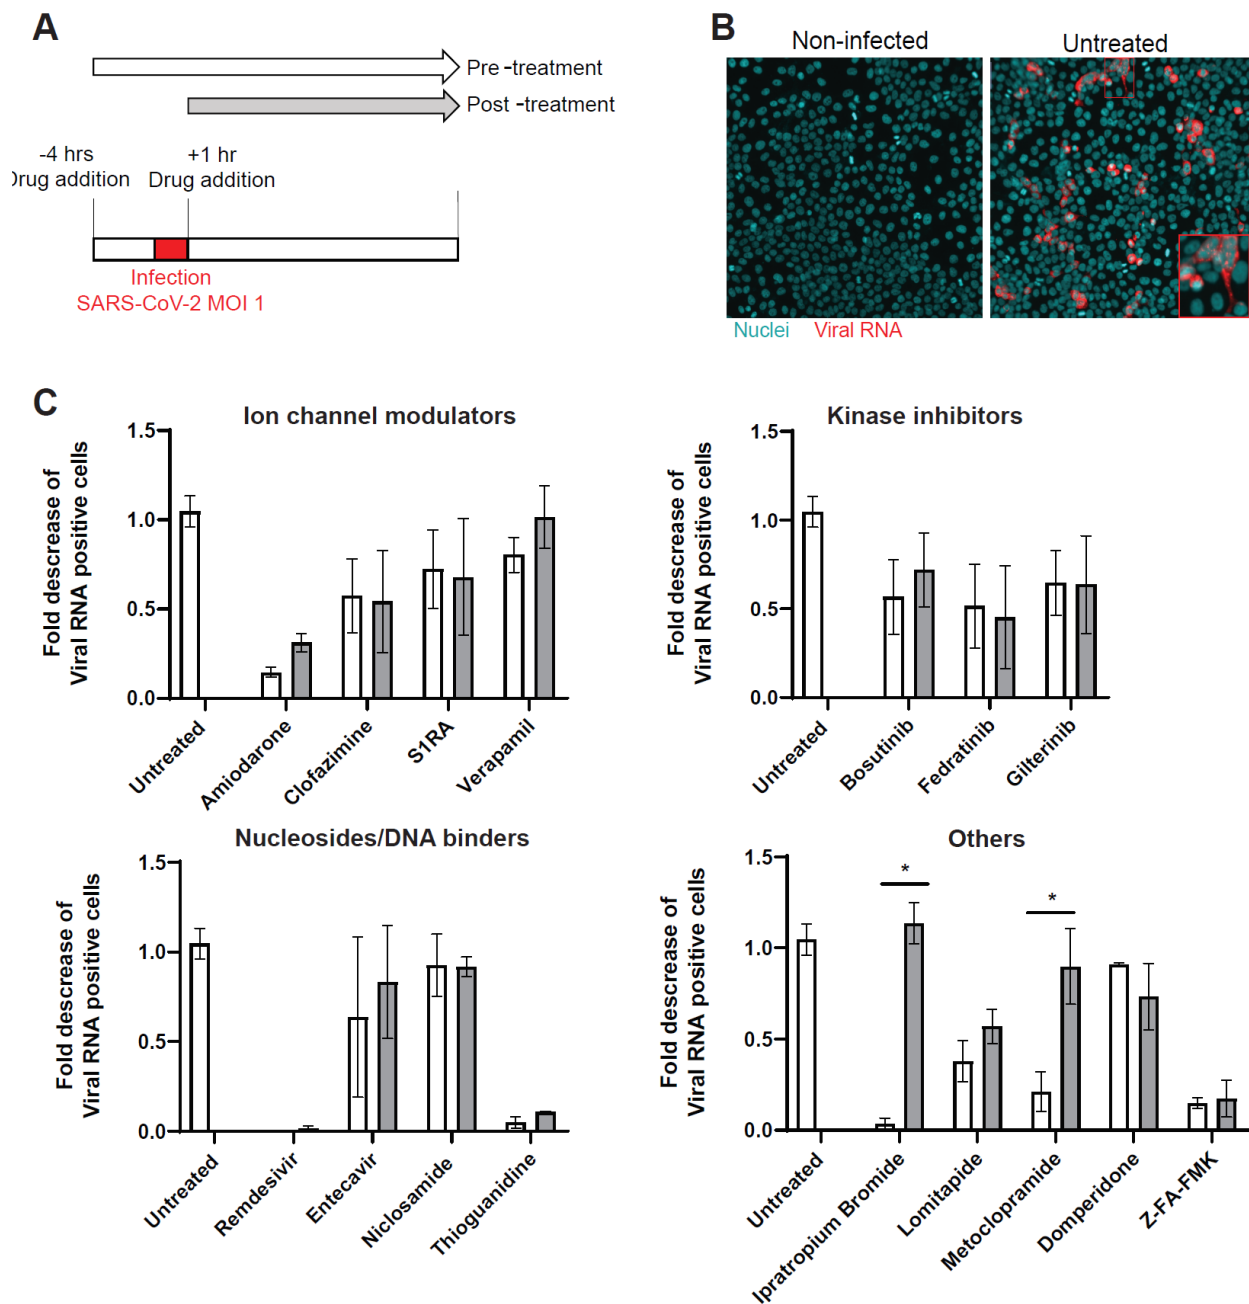

564  
565 Figure 4. Time of drug-addition of the identified antiviral hits. A) Experimental scheme where  
566 compounds are added 4 hrs prior (same treatment window as drug screening) or 1 hr  
567 postinfection (p.i.) with SARS-CoV-2 (MOI of 1). Huh7 cells are fixed, permeabilized and  
568 subjected to RNAscope analysis 48 hrs p.i. B) Representative image of SARS-CoV-2 infected  
569 and non-infected Huh7 cells acquired on the CX5 high-content platform at 10X and analyzed  
570 with Fiji ImageJ. Viral RNA is represented in red, nuclei in cyan. C) Time of drug-addition for  
571 selected antiviral hits (at 10x IC<sub>50</sub> dose) organized according to the compound class. Graphs  
572 represent the fold decrease of infection over the untreated condition. Infection was calculated on  
573 the viral RNA image after image segmentation with Cell Profiler. Graphs represent an average  
574 SEM of N=3 biological replicates. Statistical significance determined using multiple student's t-  
575 test with the Bonferroni-Dunn correction method, with alpha = 0.05. \*p<0.01.  
576

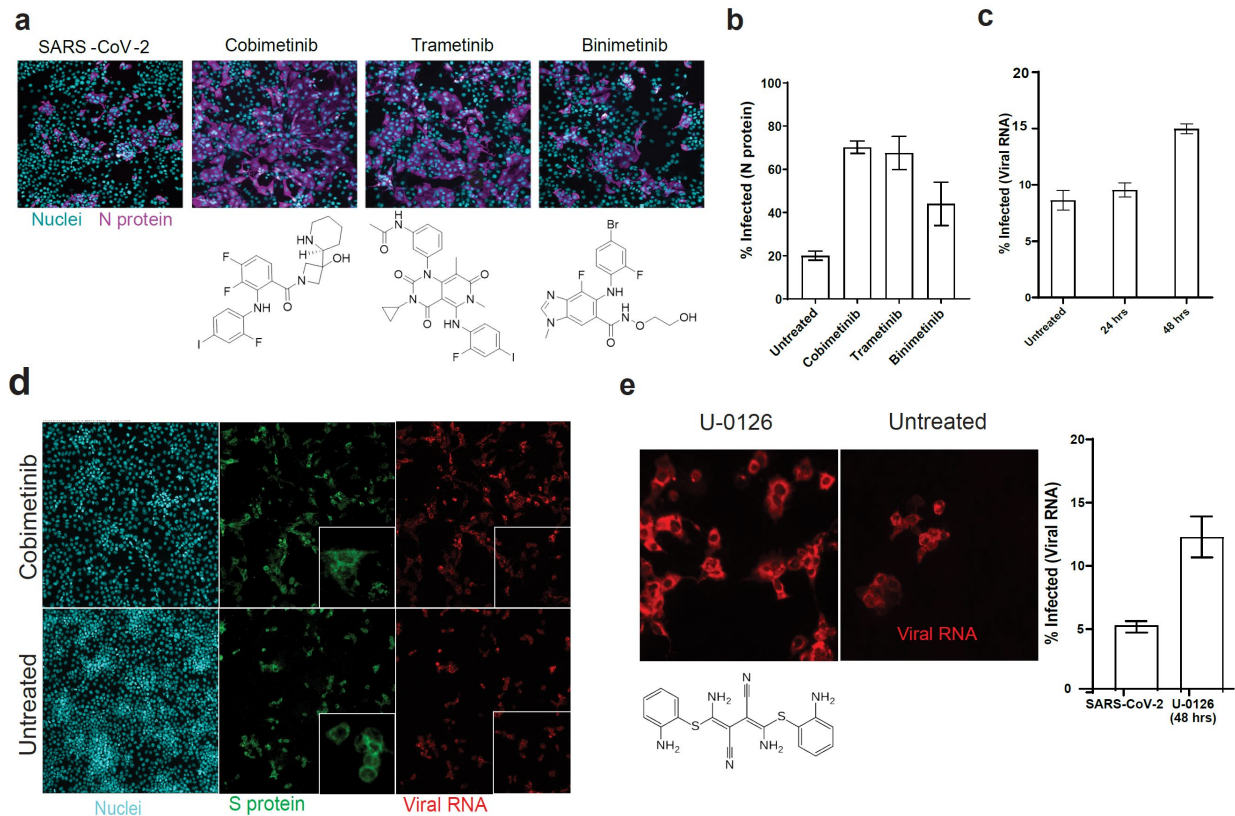

577  
 578 Figure 5. Selective MEK inhibitors exacerbate SARS-CoV-2 infection. A) Representative images  
 579 of Huh7 cells infected with SARS-CoV-2 (MOI of 0.2) and treated with cobimetinib (250 nM),  
 580 trametinib (250 nM), and binimetinib (250 nM) with nuclei in cyan and N protein in magenta.  
 581 Viral infection was calculated on N protein images after image segmentation with Cell Profiler.  
 582 Bars represent N=3 technical replicates and unpaired t-tests with Welch's correction were  
 583 performed in Graphpad Prism. \* p<0.001. B) RNAscope of Huh7 infected with SARS-CoV-2  
 584 (MOI of 1) treated with cobimetinib (1000 nM) and harvested at 24 hrs and 48 hrs p.i. Graph  
 585 represents average, SEM of N=3 biological replicates. D) Representative images of SARS-CoV-  
 586 2-infected (MOI of 1) and cobimetinib (1000 nM)-treated Huh7. Cells were harvested 48 hrs p.i.,  
 587 subjected to RNAscope to detect viral RNA (positive strand, in red) and counterstained with  
 588 anti-S protein antibody (green) and Hoechst 33342 (nuclei in cyan). E) SARS-CoV-2-infected  
 589 (MOI of 1) Huh7 were treated with U-0126 (10  $\mu$ M) and subjected to RNAscope 48 hrs p.i.  
 590 Graph represents average SEM of N=2 biological replicates, each with three technical  
 591 replicates.

592  
 593  
 594  
 595  
 596  
 597  
 598  
 599  
 600  
 601  
 602

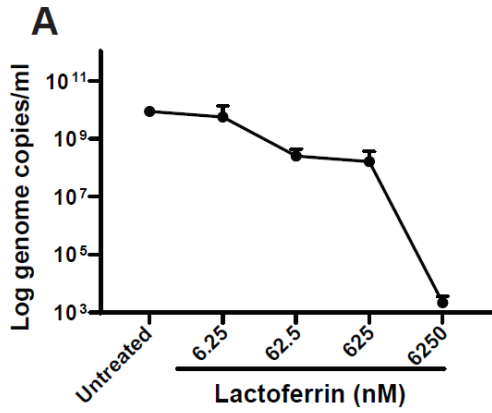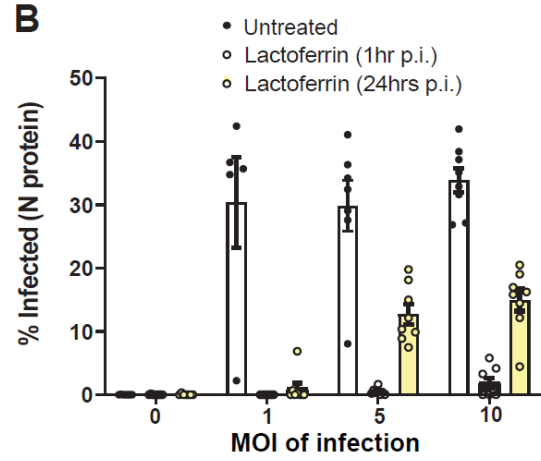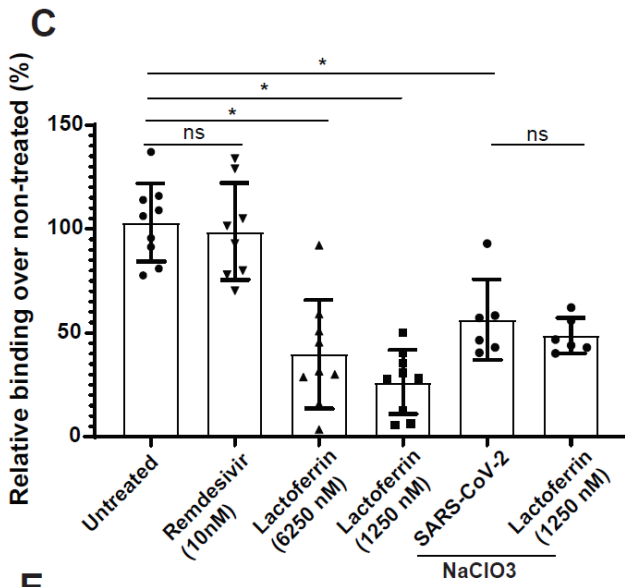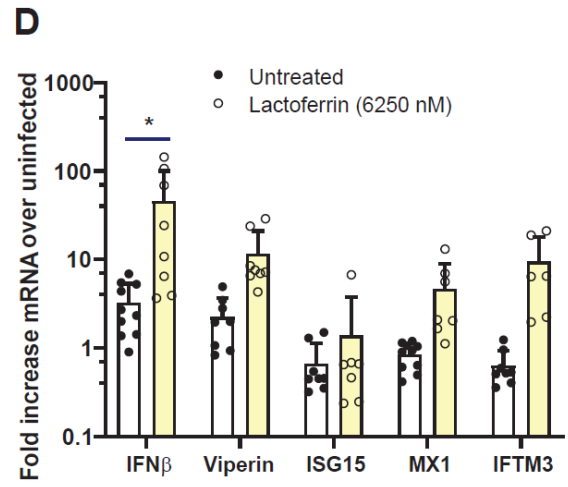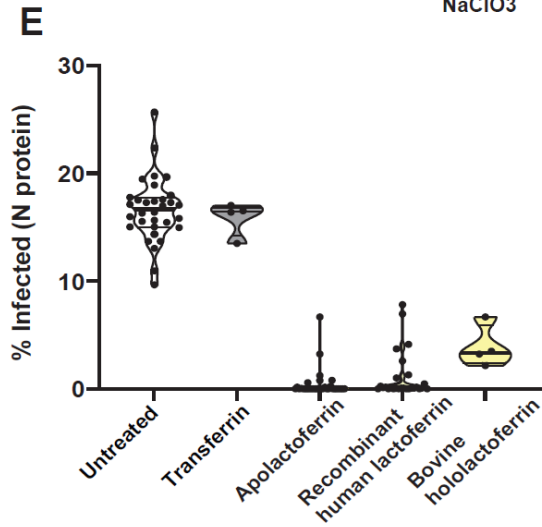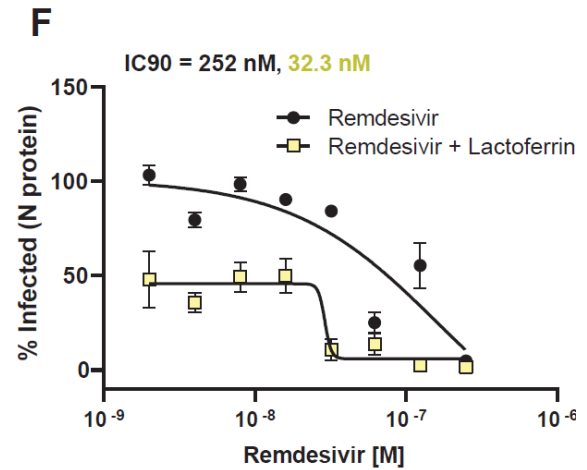

603  
604  
605  
606  
607

608  
609 Figure 6. Lactoferrin blocks SARS-CoV-2 replication at different stages of the viral cycle. A)  
610 Huh7 cells were infected with SARS-CoV-2 at MOI of 0.2 for 48 hrs and treated with increasing  
611 concentration of lactoferrin (5.75 nM – 5750 nM). Cells were harvested and RNA was extracted.  
612 Viral genome copies were calculated by RT-qPCR with an absolute quantification method. B)  
613 Huh7 were infected with SARS-CoV-2 (MOI of 1, 5 and 10; MOI of 0 indicates non-infected  
614 cells) and treated with 2.3  $\mu$ M of lactoferrin at 1 and 24 hrs p.i. Bars indicate the percentage of  
615 infected cells in different conditions. Data is an average of eight replicates. Statistical  
616 significance determined using multiple student's t-test with the Bonferroni-Dunn method, with  
617 alpha = 0.05. Except for MOI of 0, all conditions (Untreated vs Lactoferrin, 1 hr or Untreated vs  
618 Lactoferrin, 24 hr) differ by  $p < 0.0001$ . C) Binding assay. Huh7 cells were pre-incubated on ice  
619 with compounds: lactoferrin (100  $\mu$ g/mL and 500  $\mu$ g/mL) and remdesivir (10 nM), as a negative  
620 control, for one hour and then infected with SARS-CoV-2 (MOI of 10) for 1h on ice. Cells were  
621 then washed thoroughly with PBS to remove unbound virus and viral RNA was quantified by  
622 RT-qPCR. Huh7 cultured in  $\text{NaClO}_3$  for 7 days, which strips heparan sulfate proteoglycans from  
623 the cell surface, were used as a control for lactoferrin mode of action. Data is shown after  
624 normalization to viral control (100%) and represent an average of N=3 biological replicates with  
625 N=2-3 technical replicates each. Unpaired t-tests with Welch's correction were performed in  
626 Graphpad Prism to determine significance.  $*p < 0.0001$ . D) mRNA levels of cellular IFN $\beta$ , MX1,  
627 ISG15 and IFITM3 were calculated with  $\Delta\Delta\text{Ct}$  in SARS-CoV-2 infected and lactoferrin (5750  
628 nM)-treated cells over uninfected Huh7. Data are average SD of N=2 biological replicates with  
629 n=3 technical replicates each. Statistical significance was determined using multiple student's t-  
630 test with the Bonferroni-Dunn method with alpha = 0.05.  $*p < 0.001$ . E) Percentage of SARS-  
631 CoV-2 infected Huh7 cells upon treatment with bovine apolactoferrin and hololactoferrin, native  
632 human lactoferrin, and transferrin at a concentration of 2.3  $\mu$ M. F) Dose response of lactoferrin  
633 (0 to 2.3  $\mu$ M) in combination with remdesivir (0 to 30 nM). Cells were pre-treated with  
634 combination or single therapy and infected with SARS-CoV-2 (MOI of 0.2) for 48 hrs.

635  
636  
637  
638  
639  
640  
641  
642  
643  
644  
645  
646  
647  
648  
649  
650  
651  
652  
653  
654  
655  
656  
657  
658

659 Table 1: Compound Summary

660

| ID Drug Bank ID | Compound name              | Indication                                                                    | General mechanism of action                                | Potential mode of action against SARS-CoV2                                                                                                                                 | IC50 (nM) Huh-7 | IC50 (nM) Vero E6 | IC50 (nM) Caco-2 E6 | IC50 (nM) LNcap E6 | IC50 (nM) iAEC2 |
|-----------------|----------------------------|-------------------------------------------------------------------------------|------------------------------------------------------------|----------------------------------------------------------------------------------------------------------------------------------------------------------------------------|-----------------|-------------------|---------------------|--------------------|-----------------|
| DB01118         | Amiodarone (hydrochloride) | Treatment of ventricular tachycardia                                          | Inhibitor of K and Ca channels                             | Entry inhibitor<br>Evaluated in clinical trial for COVID19 (NCT04351763)                                                                                                   | 167             | 1406              | 5500                | >5000              | 118             |
| DB06616         | Bosutinib                  | Treatment of chronic myeloid leukemia                                         | Bcr-Abl kinase inhibitor                                   | Inhibitor of S protein fusion similar to the related Imatinib                                                                                                              | 20              | >5000             | IA                  | Inverse            | IA              |
| DB00845         | Clofazimine                | Treatment of leprosy                                                          | Binds to mycobacterial DNA and K transporters inhibitor    | Entry inhibitor<br>Evaluated in clinical trial for COVID19 (NCT04465695)                                                                                                   | 85              | >5000             | >5000               | 29                 | >5000           |
| DB01184         | Domperidone                | Antiemetic                                                                    | Dopamine D2 receptor antagonist                            | Host modulation                                                                                                                                                            | 44              | IA                | IA                  | ND                 | IA              |
| DB00442         | Entecavir (hydrate)        | Treatment of hepatitis B virus                                                | Transcription inhibitor, nucleoside analog                 | Replication inhibitor                                                                                                                                                      | 42              | >5000             | IA                  | IA                 | IA              |
| DB12500         | Fedratinib                 | Treatment of intermediate-2 and high risk primary and secondary myelofibrosis | Tyrosine kinase inhibitor (Jak1)                           | Predicted inhibitor of kinase (NAK) family reported to reduce viral infection in vitro.<br>Reduction of TH17 responses responsible of SARS-CoV-2 associated cytokine storm | 24              | >5000             | >5000               | >5000              | 1810            |
| DB12141         | Gilteritinib               | Treatment of FLT3-mutated acute myeloid leukemia (AML)                        | FMS-like tyrosine kinase 3 (FLT3) inhibitor                | Host modulation                                                                                                                                                            | 225             | 2344              | IA                  | IA                 | >5000           |
| DB00332         | Ipratropium Bromide        | Treatment of COPD and asthma                                                  | Muscarinic receptor antagonist                             | Binding inhibitor                                                                                                                                                          | 56              | NA                | 85                  | >5000              | 4               |
| NA              | Lactoferrin                | Diet supplement                                                               | Iron chelator, immune-modulator<br>Antimicrobial activity  | Entry and post-entry inhibitor                                                                                                                                             | 308             | NA                | 1170                | 157                | 45              |
| DB08827         | Lomitapide                 | Treatment of homozygous familial hypercholesterolemia                         | Microsomal triglyceride transfer protein (MTP) inhibitor   | Host lipid metabolism modulation                                                                                                                                           | 765             | 1875              | >5000               | IA                 | 733             |
| DB01233         | Metoclopramide             | Treatment of diabetic gastroparesis                                           | Dopamine D2 and serotonin 5-HT3 receptor inhibitor         | Binding inhibitor                                                                                                                                                          | 468             | >5000             | IA                  | IA                 | IA              |
| DB06803         | Nicosamide                 | Treatment of tapeworm infections                                              | Mitochondrial uncoupler, mTORC1 inhibitor                  | Autophagy and endocytic pathway inhibitor                                                                                                                                  | 142             | >5000             | IA                  | >5000              | NA              |
| DB14761         | Remdesivir                 | Investigational for Ebola virus treatment                                     | Transcription inhibitor, nucleoside analog                 | Replication inhibitor<br>Emergency FDA approval for COVID19                                                                                                                | 97              | NA                | 19                  | 106                | 18              |
| ZINC95000617    | S1RA                       | Treatment of neuropathic pain (phase II)                                      | Sigma R1/R2 modulator                                      | Entry inhibitor                                                                                                                                                            | 222             | >5000             | >5000               | IA                 | 1               |
| DB00352         | Thioguanine                | Therapy of acute leukemia                                                     | Guanine analogue                                           | Replication inhibitor                                                                                                                                                      | 178             | 820               | 674                 | 29                 | IA              |
| DB00661         | Verapamil (hydrochloride)  | Treatment of high blood pressure, heart arrhythmias, and angina               | Ca channel inhibitor                                       | Entry inhibitor<br>Evaluated in clinical trial for COVID19 (NCT04351763)                                                                                                   | 534             | >5000             | Low                 | 18                 | NA              |
| CAS 197855-65-5 | Z-FA-FMK                   | Preclinical                                                                   | Irreversible inhibitor of cysteine proteases (cathepsin L) | Entry inhibitor                                                                                                                                                            | 11              | 51                | Low                 | 514                | 4               |

661  
662

663 NA=not tested, IA-inactive, >5000 indicates activity but loss of potency, Low=IC50 below 1nM.  
664 Grey rows indicate compounds with efficacy across multiple cell systems.

665  
666  
667  
668  
669  
670  
671  
672  
673  
674  
675  
676  
677  
678  
679  
680  
681  
682  
683  
684

685 **SUPPLEMENTARY INFORMATION**

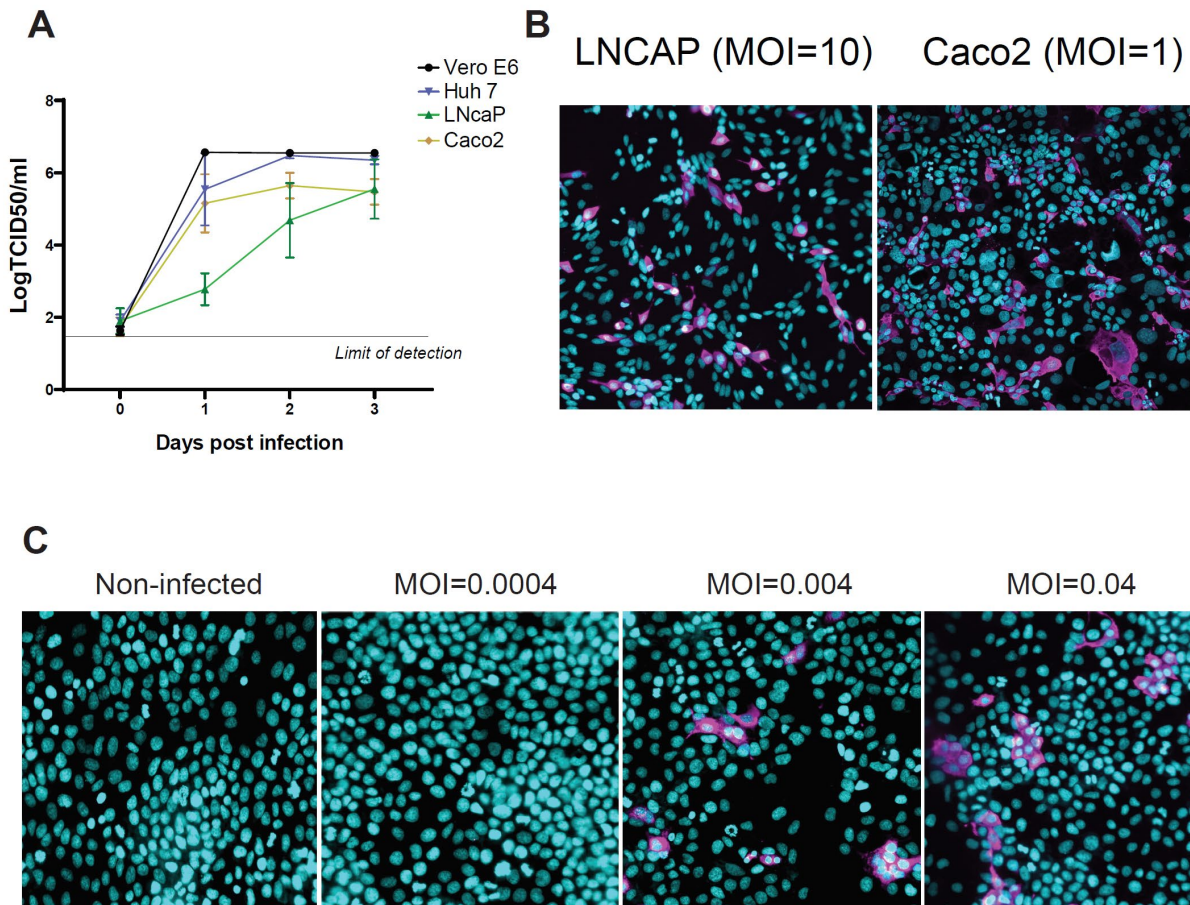

686

687 **Supplementary Figure 1:** a) Growth kinetics of Vero E6, Huh-7 and Caco-2 cells. Cells were  
688 infected in 48-well plates with SARS-CoV-2 at an MOI of 0.2 and harvested at day 0 (1h post  
689 adsorption), day 1, 2 and 3. TCID<sub>50</sub> determination was performed on the supernatant and cellular  
690 fraction. Graph represents median, SD of N=2 biological replicates with n=3 technical replicate  
691 each. B) Syncytia formation (magenta, anti-SARS-CoV-2 N antibody) in SARS-CoV-2 infected  
692 Vero E6 (left) and Caco2 (right) cells counter stained with Hoechst 33342 (cyan) and anti-SARS-  
693 CoV-2 N antibody (magenta).[\[CW1\]](#) C) Limit of detection of the assay. Huh-7 cells were infected at  
694 indicated MOI and imaged at 48h p.i. Progressive and more feature-rich syncytia formation was  
695 observed in correlation with an increased MOI and detection was possible with infection as low  
696 as MOI 0.004.

697

698

699

## 700 REFERENCES

701

- 702 1. Xiao F, Tang M, Zheng X, Liu Y, Li X, Shan H. 2020. Evidence for Gastrointestinal Infection of SARS-  
703 CoV-2. *Gastroenterology*.
- 704 2. Lin L, Jiang X, Zhang Z, Huang S, Zhang Z, Fang Z, Gu Z, Gao L, Shi H, Mai L, Liu Y, Lin X, Lai R, Yan Z, Li  
705 X, Shan H. 2020. Gastrointestinal symptoms of 95 cases with SARS-CoV-2 infection. *Gut* 69:997–  
706 1001.
- 707 3. Avula A, Nalleballe K, Narula N, Sapozhnikov S, Dandu V, Toom S, Glaser A, Elsayegh D. 2020.  
708 COVID-19 presenting as stroke. *Brain Behav Immun* <https://doi.org/10.1016/j.bbi.2020.04.077>.
- 709 4. Kochi AN, Tagliari AP, Forleo GB, Fassini GM, Tondo C. 2020. Cardiac and arrhythmic complications  
710 in patients with COVID-19. *J Cardiovasc Electrophysiol* 31:1003–1008.
- 711 5. Mulangu S, Dodd LE, Davey RT Jr, Tshiani Mbaya O, Proschan M, Mukadi D, Lusakibanza Manzo M,  
712 Nzolo D, Tshomba Oloma A, Ibanda A, Ali R, Coulibaly S, Levine AC, Grais R, Diaz J, Lane HC,  
713 Muyembe-Tamfum J-J, PALM Writing Group, Sivahera B, Camara M, Kojan R, Walker R, Dighero-  
714 Kemp B, Cao H, Mukumbayi P, Mbala-Kingebeni P, Ahuka S, Albert S, Bonnett T, Crozier I,  
715 Duvenhage M, Proffitt C, Teitelbaum M, Moench T, Aboulhab J, Barrett K, Cahill K, Cone K, Eckes R,  
716 Hensley L, Herpin B, Higgs E, Ledgerwood J, Pierson J, Smolskis M, Sow Y, Tierney J, Sivapalasingam  
717 S, Holman W, Gettinger N, Vallée D, Nordwall J, PALM Consortium Study Team. 2019. A  
718 Randomized, Controlled Trial of Ebola Virus Disease Therapeutics. *N Engl J Med* 381:2293–2303.
- 719 6. Oprea TI, Bauman JE, Bologa CG, Buranda T, Chigaev A, Edwards BS, Jarvik JW, Gresham HD, Haynes  
720 MK, Hjelle B, Hromas R, Hudson L, Mackenzie DA, Muller CY, Reed JC, Simons PC, Smagley Y,  
721 Strouse J, Surviladze Z, Thompson T, Ursu O, Waller A, Wandinger-Ness A, Winter SS, Wu Y, Young  
722 SM, Larson RS, Willman C, Sklar LA. 2011. Drug Repurposing from an Academic Perspective. *Drug*  
723 *Discov Today Ther Strateg* 8:61–69.
- 724 7. McQuin C, Goodman A, Chernyshev V, Kametsky L, Cimini BA, Karhohs KW, Doan M, Ding L,  
725 Rafelski SM, Thirstrup D, Wiegnaebe W, Singh S, Becker T, Caicedo JC, Carpenter AE. 2018.  
726 *CellProfiler 3.0: Next-generation image processing for biology*. *PLoS Biol* 16:e2005970.
- 727 8. Chen W, Li X-M, Li A-L, Yang G, Hu H-N. 2016. Hepatitis C Virus Increases Free Fatty Acids  
728 Absorption and Promotes its Replication Via Down-Regulating GADD45 $\alpha$  Expression. *Med Sci Monit*  
729 22:2347–2356.
- 730 9. Riva L, Yuan S, Yin X, Martin-Sancho L, Matsunaga N, Pache L, Burgstaller-Muehlbacher S, De Jesus  
731 PD, Teriete P, Hull MV, Chang MW, Chan JF-W, Cao J, Poon VK-M, Herbert KM, Cheng K, Nguyen T-  
732 TH, Rubanov A, Pu Y, Nguyen C, Choi A, Rathnasinghe R, Schotsaert M, Miorin L, Dejez M, Zwaka  
733 TP, Sit K-Y, Martinez-Sobrido L, Liu W-C, White KM, Chapman ME, Lendy EK, Glynne RJ, Albrecht R,  
734 Ruppin E, Mesecar AD, Johnson JR, Benner C, Sun R, Schultz PG, Su AI, García-Sastre A, Chatterjee  
735 AK, Yuen K-Y, Chanda SK. 2020. Discovery of SARS-CoV-2 antiviral drugs through large-scale  
736 compound repurposing. *Nature* 586:113–119.

- 737 10. Heiser K, McLean PF, Davis CT, Fogelson B, Gordon HB, Jacobson P, Hurst B, Miller B, Alfa RW,  
738 Earnshaw BA, Victors ML, Chong YT, Haque IS, Low AS, Gibson CC. 2020. Identification of potential  
739 treatments for COVID-19 through artificial intelligence-enabled phenomic analysis of human cells  
740 infected with SARS-CoV-2. *bioRxiv*.
- 741 11. Jeon S, Ko M, Lee J, Choi I, Byun SY, Park S, Shum D, Kim S. Identification of antiviral drug  
742 candidates against SARS-CoV-2 from FDA-approved drugs.
- 743 12. Yang L, Pei R-J, Li H, Ma X-N, Zhou Y, Zhu F-H, He P-L, Tang W, Zhang Y-C, Xiong J, Xiao S-Q, Tong X-  
744 K, Zhang B, Zuo J-P. 2020. Identification of SARS-CoV-2 entry inhibitors among already approved  
745 drugs. *Acta Pharmacol Sin* <https://doi.org/10.1038/s41401-020-00556-6>.
- 746 13. Hurley K, Ding J, Villacorta-Martin C, Herriges MJ, Jacob A, Vedaie M, Alysandratos KD, Sun YL, Lin C,  
747 Werder RB, Huang J, Wilson AA, Mithal A, Mostoslavsky G, Oglesby I, Caballero IS, Guttentag SH,  
748 Ahangari F, Kaminski N, Rodriguez-Fraticelli A, Camargo F, Bar-Joseph Z, Kotton DN. 2020.  
749 Reconstructed Single-Cell Fate Trajectories Define Lineage Plasticity Windows during Differentiation  
750 of Human PSC-Derived Distal Lung Progenitors. *Cell Stem Cell* 26:593–608.e8.
- 751 14. Mason RJ. 2020. Pathogenesis of COVID-19 from a cell biology perspective. *Eur Respir J* 55.
- 752 15. Lang J, Yang N, Deng J, Liu K, Yang P, Zhang G, Jiang C. 2011. Inhibition of SARS pseudovirus cell  
753 entry by lactoferrin binding to heparan sulfate proteoglycans. *PLoS One* 6:e23710.
- 754 16. Kell DB, Heyden EL, Pretorius E. 2020. The Biology of Lactoferrin, an Iron-Binding Protein That Can  
755 Help Defend Against Viruses and Bacteria. *Front Immunol* 11:1221.
- 756 17. Baeuerle PA, Huttner WB. 1986. Chlorate — a potent inhibitor of protein sulfation in intact cells.  
757 *Biochemical and Biophysical Research Communications*.
- 758 18. Siqueiros-Cendón T, Arévalo-Gallegos S, Iglesias-Figueroa BF, García-Montoya IA, Salazar-Martínez  
759 J, Rascón-Cruz Q. 2014. Immunomodulatory effects of lactoferrin. *Acta Pharmacol Sin* 35:557–566.
- 760 19. Blanco-Melo D, Nilsson-Payant BE, Liu W-C, Uhl S, Hoagland D, Møller R, Jordan TX, Oishi K, Panis  
761 M, Sachs D, Wang TT, Schwartz RE, Lim JK, Albrecht RA, tenOever BR. 2020. Imbalanced Host  
762 Response to SARS-CoV-2 Drives Development of COVID-19. *Cell* 181:1036–1045.e9.
- 763 20. Kuleshov MV, Stein DJ, Clarke DJB, Kropiwnicki E, Jagodnik KM, Bartal A, Evangelista JE, Hom J,  
764 Cheng M, Bailey A, Zhou A, Ferguson LB, Lachmann A, Ma'ayan A. 2020. The COVID-19 Drug and  
765 Gene Set Library. *Patterns*.
- 766 21. Yin W, Mao C, Luan X, Shen D-D, Shen Q, Su H, Wang X, Zhou F, Zhao W, Gao M, Chang S, Xie Y-C,  
767 Tian G, Jiang H-W, Tao S-C, Shen J, Jiang Y, Jiang H, Xu Y, Zhang S, Zhang Y, Xu HE. 2020. Structural  
768 basis for inhibition of the RNA-dependent RNA polymerase from SARS-CoV-2 by remdesivir. *Science*  
769 368:1499–1504.
- 770 22. Ghahremanpour MM, Tirado-Rives J, Deshmukh M, Ippolito JA, Zhang C-H, de Vaca IC, Liosi M-E,  
771 Anderson KS, Jorgensen WL. Identification of 14 Known Drugs as Inhibitors of the Main Protease of  
772 SARS-CoV-2.



- 773 23. Roscow O, Ganassin R, Garver K, Polinski M. 2018. Z-FA-FMK demonstrates differential inhibition of  
774 aquatic orthoreovirus (PRV), aquareovirus (CSRV), and rhabdovirus (IHNV) replication. *Virus Res*  
775 244:194–198.
- 776 24. Ou X, Liu Y, Lei X, Li P, Mi D, Ren L, Guo L, Guo R, Chen T, Hu J, Xiang Z, Mu Z, Chen X, Chen J, Hu K,  
777 Jin Q, Wang J, Qian Z. 2020. Characterization of spike glycoprotein of SARS-CoV-2 on virus entry and  
778 its immune cross-reactivity with SARS-CoV. *Nat Commun* 11:1620.
- 779 25. Pardanani A, Hood J, Lasho T, Levine RL, Martin MB, Noronha G, Finke C, Mak CC, Mesa R, Zhu H,  
780 Others. 2007. TG101209, a small molecule JAK2-selective kinase inhibitor potently inhibits  
781 myeloproliferative disorder-associated JAK2 V617F and MPL W515L/K mutations. *Leukemia*  
782 21:1658–1668.
- 783 26. Wu D, Yang XO. 2020. TH17 responses in cytokine storm of COVID-19: An emerging target of JAK2  
784 inhibitor Fedratinib. *J Microbiol Immunol Infect* <https://doi.org/10.1016/j.jmii.2020.03.005>.
- 785 27. Zhang W, Zhao Y, Zhang F, Wang Q, Li T, Liu Z, Wang J, Qin Y, Zhang X, Yan X, Zeng X, Zhang S. 2020.  
786 The use of anti-inflammatory drugs in the treatment of people with severe coronavirus disease  
787 2019 (COVID-19): The Perspectives of clinical immunologists from China. *Clinical Immunology*.
- 788 28. Stebbing J, Phelan A, Griffin I, Tucker C, Oechsle O, Smith D, Richardson P. 2020. COVID-19:  
789 combining antiviral and anti-inflammatory treatments. *Lancet Infect Dis*. [thelancet.com](https://www.thelancet.com).
- 790 29. Treatment of Moderate to Severe Coronavirus Disease (COVID-19) in Hospitalized Patients - Full  
791 Text View - [ClinicalTrials.gov](https://clinicaltrials.gov).
- 792 30. Cai Y, Liu Y, Zhang X. 2007. Suppression of coronavirus replication by inhibition of the MEK signaling  
793 pathway. *J Virol* 81:446–456.
- 794 31. Gu J, Han B, Wang J. 2020. COVID-19: gastrointestinal manifestations and potential fecal–oral  
795 transmission. *Gastroenterology* 158:1518–1519.
- 796 32. Reghunathan R, Jayapal M, Hsu L-Y, Chng H-H, Tai D, Leung BP, Melendez AJ. 2005. Expression  
797 profile of immune response genes in patients with Severe Acute Respiratory Syndrome. *BMC*  
798 *Immunol* 6:2.
- 799 33. Han C, Duan C, Zhang S, Spiegel B, Shi H, Wang W, Zhang L, Lin R, Liu J, Ding Z, Hou X. 2020.  
800 Digestive Symptoms in COVID-19 Patients With Mild Disease Severity: Clinical Presentation, Stool  
801 Viral RNA Testing, and Outcomes. *Am J Gastroenterol*  
802 <https://doi.org/10.14309/ajg.0000000000000664>.
- 803 34. Oda H, Kolawole AO, Mirabelli C, Wakabayashi H, Tanaka M, Yamauchi K, Abe F, Wobus CE. 2020.  
804 Antiviral Effects of Bovine Lactoferrin on Human Norovirus. *Biochem Cell Biol*  
805 <https://doi.org/10.1139/bcb-2020-0035>.
- 806 35. Cutone A, Frioni A, Berlutti F, Valenti P, Musci G, Bonaccorsi di Patti MC. 2014. Lactoferrin prevents  
807 LPS-induced decrease of the iron exporter ferroportin in human monocytes/macrophages.  
808 *Biometals* 27:807–813.

- 809 36. Conti P, Ronconi G, Caraffa A, Gallenga C, Ross R, Frydas I, Kritas S. 2020. Induction of pro-  
810 inflammatory cytokines (IL-1 and IL-6) and lung inflammation by Coronavirus-19 (COVI-19 or SARS-  
811 CoV-2): anti-inflammatory strategies. *J Biol Regul Homeost Agents* 34.
- 812 37. Lagunas-Rangel FA, Chávez-Valencia V. 2020. High IL-6/IFN- $\gamma$  ratio could be associated with severe  
813 disease in COVID-19 patients. *J Med Virol* <https://doi.org/10.1002/jmv.25900>.
- 814 38. Hung IF-N, Lung K-C, Tso EY-K, Liu R, Chung TW-H, Chu M-Y, Ng Y-Y, Lo J, Chan J, Tam AR, Shum H-P,  
815 Chan V, Wu AK-L, Sin K-M, Leung W-S, Law W-L, Lung DC, Sin S, Yeung P, Yip CC-Y, Zhang RR, Fung  
816 AY-F, Yan EY-W, Leung K-H, Ip JD, Chu AW-H, Chan W-M, Ng AC-K, Lee R, Fung K, Yeung A, Wu T-C,  
817 Chan JW-M, Yan W-W, Chan W-M, Chan JF-W, Lie AK-W, Tsang OT-Y, Cheng VC-C, Que T-L, Lau C-S,  
818 Chan K-H, To KK-W, Yuen K-Y. 2020. Triple combination of interferon beta-1b, lopinavir–ritonavir,  
819 and ribavirin in the treatment of patients admitted to hospital with COVID-19: an open-label,  
820 randomised, phase 2 trial. *Lancet* [https://doi.org/10.1016/S0140-6736\(20\)31042-4](https://doi.org/10.1016/S0140-6736(20)31042-4).
- 821 39. Jacob A, Morley M, Hawkins F, McCauley KB, Jean JC, Heins H, Na C-L, Weaver TE, Vedaie M, Hurley  
822 K, Hinds A, Russo SJ, Kook S, Zacharias W, Ochs M, Traber K, Quinton LJ, Crane A, Davis BR, White  
823 FV, Wambach J, Whitsett JA, Cole FS, Morrisey EE, Guttentag SH, Beers MF, Kotton DN. 2017.  
824 Differentiation of Human Pluripotent Stem Cells into Functional Lung Alveolar Epithelial Cells. *Cell*  
825 *Stem Cell* 21:472–488.e10.
- 826 40. Berthold MR, Cebon N, Dill F, Gabriel TR, Kötter T, Meinel T, Ohl P, Thiel K, Wiswedel B. 2009.  
827 KNIME - the Konstanz information miner. *ACM SIGKDD Explorations Newsletter*.
- 828 41. McInnes L, Healy J, Melville J. 2018. UMAP: Uniform Manifold Approximation and Projection for  
829 Dimension Reduction. *arXiv [statML]*.
- 830 42. Stevens J-LR, Rudiger P, Bednar JA. 2015. HoloViews: Building complex visualizations easily for  
831 reproducible science, p. 61–69. In *Proceedings of the 14th Python in Science Conference*.
